# Supplementary material
Source: Springer Nature journal article supplement (https://www.springermedizin.de/resource/supplementary/12889_2005_475_MOESM1_ESM.pdf/9500952)
Supplement: MOESM1 [file 9500952]

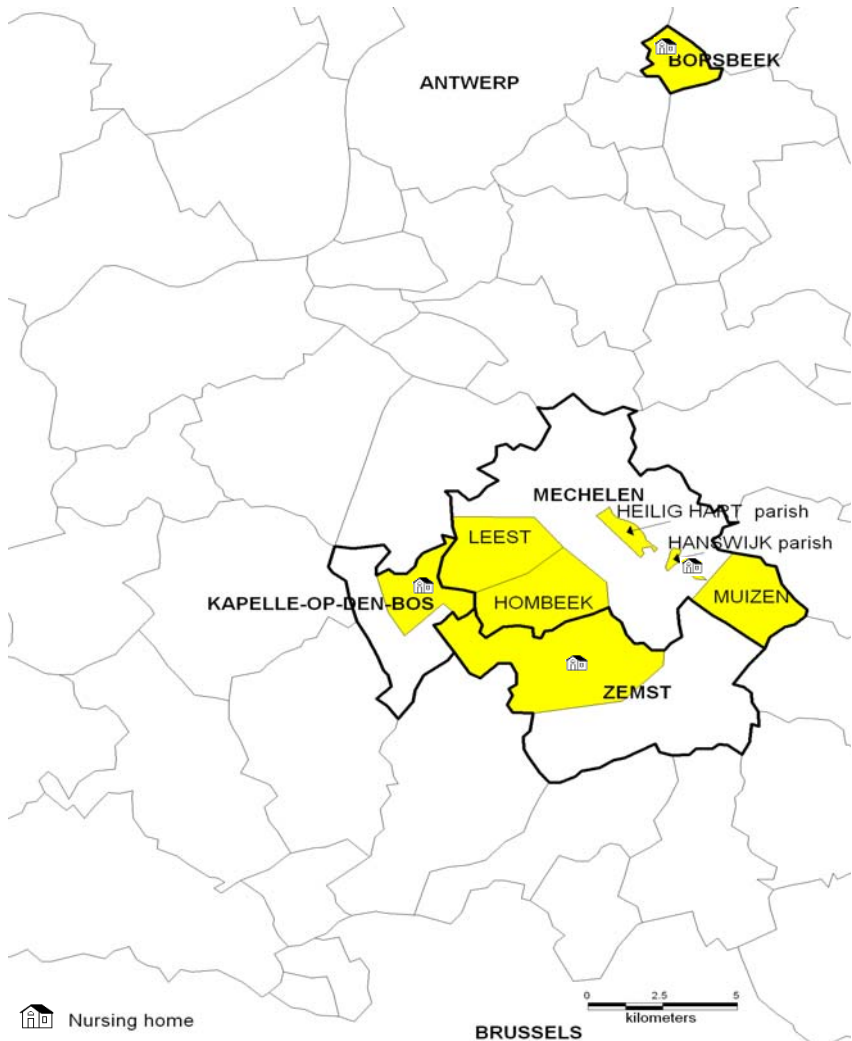

ANTWERP

BORSBEEK

MECHELEN  
HEILIG HART parish

HANSWIJK parish

LEEST

HOMBEEK

MUIZEN

KAPELLE-OP-DEN-BOS

ZEMST

 Nursing home

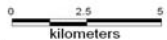

BRUSSELS
